# Supplementary material for: On the fringes of the law? Territorial Management and Legal Conflicts in Vulnerable Coastal Environments in Northeast Brazil
Source: Research Square preprint supplement (doi:10.21203/rs.3.rs-7368390/v1), 2025-08-25
Supplement: Supplementary file 1 [file e5c0250b3332afe7cbd1f79c.xlsx]

## Sheet: Sheet1
YEAR	LEGAL FRAMEWORKS / INSTRUMENTS	LEGAL REFERENCE	Type of legal document	Type of Initiative	Sphere of Action	Does it regulate stretches of waterfront?	Does it mention any limits on use?	Does it relate to coastal erosion?	Link to document
1831	Budgets the revenue and sets the expenditure for the financial year 1832 - 1833	Federal Law of November 15, 1831	Law	Public Policy	Federal	Yes	Navy land	No	https://www2.camara.leg.br/legin/fed/lei_sn/1824-1899/lei-37687-15-novembro-1831-564851-publicacaooriginal-88758-pl.html
1934	Decrees the Water Code	Federal Decree No. 24.643, July 10, 1934	Decree	Public Policy	Federal	Yes	Art. 13: All land bathed by the waters of the sea or navigable rivers that extends up to 33 meters from the point at which the mean high tide reaches the shore is considered to be marine land. This point refers to the state of the place at the time of the execution of art. 51, § 14, of the Law of November 15, 1831.	No	https://www2.camara.leg.br/legin/fed/decret/1930-1939/decreto-24643-10-julho-1934-498122-normaatualizada-pe.html#:~:text=Pertencem%20%C3%A0%20Uni%C3%A3o%20os%20terrenos,dom%C3%ADnio%20federal,%20municipal%20ou%20particular./
1940	Establishes rules for the leasing of navy land and makes other provisions	Federal Decree-Law no. 2490, of August 16, 1940	Decree-Law	Public Policy	Federal	Yes	Art. 3 The Federal Government does not recognize and holds as unsubstantiated and null and void any claims over the domain of the marine lands, thus considered those which, bathed by the waters of the sea and those of the rivers and lagoons as far as the influence of the tides reaches, go up to a distance of 38 meters for the part of the land, measured from the point at which the mean high tide r…	No	https://www2.camara.leg.br/legin/fed/declei/1940-1949/decreto-lei-2490-16-agosto-1940-412456-publicacaooriginal-1-pe.html
1941	Clarifies and extends Decree-Law No. 2490 of August 16, 1940	Federal Decree-Law No. 3.438, of July 17, 1941	Decree-Law	Public Policy	Federal	Yes	Art. 1: Marine land, at a depth of 33 meters, measured for the land part, from the point where the line of the mean high tide of 1831 passed:	No	https://www.planalto.gov.br/ccivil_03/decreto-lei/1937-1946/Del3438.htm
1946	Definition of marine land	Federal Decree-Law No. 9,760 of September 5, 1946	Decree-Law	Public policy	Law	Yes	Art. 2: The following are marine lands, at a depth of 33 (thirty-three) meters, measured horizontally, for the land part, from the position of the 1831 mean high tide line	No	https://www.planalto.gov.br/ccivil_03/Decreto-Lei/Del9760.htm
1967	Provides for urban allotments, responsibility of the allotment holder, concession of use and airspace, and other provisions.	Federal Decree-Law no. 271, of February 28, 1967	Decree-Law	Public Policy	Federal	No	Not applicable	No	https://www.planalto.gov.br/ccivil_03/decreto-lei/Del0271.htm
1974	Creation of the Interministerial Commission for the Resources of the Sea (CIRM)	Federal Decree 74.557 of September 12, 1974	Decree	Public Policy/Public Institution	Federal	No	Not applicable	No	https://www.planalto.gov.br/ccivil_03/decreto/Antigos/D74557.htm
1979	Provides for the Parceling of Urban Land and other Provisions	Federal Law No. 6.766, of December 1979	Law	Public Policy	Law	No	Not applicable	No	https://www.planalto.gov.br/ccivil_03/leis/L6766compilado.htm
1979	Secretariat of the Interministerial Commission for the Resources of the Sea (SECIRM) created	Federal Decree No. 84.324, of December 19, 1979	Decree	Public Institution	Federal	No	Not applicable	No	https://www.jusbrasil.com.br/legislacao/2692994306/decreto-84324-79?msockid=08ac7003203f6f5e0089654721046e48
1980	General Guidelines for the National Sea Resources Policy	Not applicable	Not applicable	Public Policy	Policy	No	Not applicable	No	nan
1981	Exempts holders of the useful domain of federal real estate from paying land fees and laudiums, in the cases it specifies, and makes other provisions.	Decree - Federal Law No. 1.876, of July 15, 1981	Decree - Law	Public Policy	Law	Yes	They are marine lands, at a depth of 33 (thirty-three) meters, measured horizontally, for the part of the land, from the position of the line of the mean high tide of 1831	No	https://www.planalto.gov.br/ccivil_03/decreto-lei/1965-1988/Del1876.htm
1981	National Environmental System (SISNAMA) created	Not applicable	Not applicable	Federal	System	No	Not applicable	No	nan
1981	National Environmental Policy	Federal Law No. 6.938, of August 31, 1981	Law	Public Policy	Law	No	Not applicable	No	https://www.planalto.gov.br/ccivil_03/Leis/L6938.htm
1982	State environmental agencies (OEMAs) created	Not applicable	Not applicable	Public Institution	Federal	No	Not applicable	No	nan
1986	Approves the II Sectorial Plan for the Resources of the Sea	Federal Decree No. 92.522, of April 7, 1986	Decree	Federal	Policy	No	Not applicable	No	https://www.planalto.gov.br/ccivil_03/decreto/1980-1989/1985-1987/D92522.htm
1986	Provides for definitions, responsibilities, basic criteria and general guidelines for the use and implementation of Environmental Impact Assessment as one of the instruments of the National Environmental Policy	CONAMA Resolution No. 01 of 1986	Resolution	Public Policy	Resolution	No	Not applicable	No	https://www.siam.mg.gov.br/sla/download.pdf?idNorma=8902
1987	Provides for forums, laudiums and occupation fees relating to properties owned by the Federal Government, and makes other provisions	Federal Decree-Law No. 2398 of December 21, 1987	Decree-Law	Public Policy	Federal	Yes	These are marine lands, at a depth of 33 (thirty-three) meters, measured horizontally, for the part of the land, from the position of the line of the mean high tide of 1831	No	https://www.planalto.gov.br/ccivil_03/decreto-lei/1965-1988/Del2398.htm
1987	Creation of the State Environmental Policy, creation of the State Environmental Council (COEMA) and creation of the State Environmental Superintendence (SEMACE)	Federal Law No. 11.411 of December 28, 1987	Law	Public Policy	Law	No	Not applicable	No	nan
1988	National Coastal Management Plan	Law No. 7.661 of May 16, 1988	Law	Public Policy	Law	Yes	Establishes generic limits through the Waterfront Project	Yes	https://www.planalto.gov.br/ccivil_03/leis/l7661.htm
1988	Brazilian Constitution	Brazilian Political Constitution of October 5, 1988	Law	Public Policy	Law	No	Not applicable	No	https://www.planalto.gov.br/ccivil_03/Constituicao/Constituicao.htm
1989	Approves the Brazilian Continental Shelf Survey Plan, and makes other provisions	Federal Decree No. 98.145 of 1989	Decree	Public Policy	Policy	No	Not applicable	No	https://www.planalto.gov.br/ccivil_03/decreto/1980-1989/d98145.htm
1989	Management of solid waste in port areas, with a view to preserving public health and environmental quality.	Federal Decree 98.145 of 1989	Decree	Public Policy	Policy	No	Not applicable	No	https://www.planalto.gov.br/ccivil_03/decreto/1980-1989/d98145.htm
1989	Constitution of the State of Ceará	Political Constitution of the State of Ceará, of October 5, 1989	Law	Public Policy	Law	Yes	Guarantees a free strip with a minimum width of 33 m between the Local Maximum High Water Mark and the first public or private street	No	https://www.normasbrasil.com.br/norma/constituicao-1989-ce_461760.html
1989	Approves the Third Sectoral Plan for Marine Resources (III PSRM)	Federal Decree No. 98.479, of December 21989	Decree	Public Policy	Decree	No	Not applicable	No	https://www.planalto.gov.br/ccivil_03/decreto/1980-1989/D98479.htm
1990	National Coastal Management Plan I	CIRM Resolution 01/1990	Resolution	Public Policy	Resolution	Yes	Establishes generic limits through the Waterfront Project	Yes	90-3-res01.doc
1991	Creation of the National Environmental Program (PNMA) 1	Not applicable	Not applicable	Program	Program	No	Not applicable	No	nan
1992	Regulates the granting of building permits in areas located in the Coastal Zone of the Municipality of Icapuí.	Municipal Law no. 111, of June 19, 1992	Law	Municipal	Law	No	Not applicable	No	LEIS_111_1992_0000001.pdf
1993	Solid waste management in port areas, with a view to preserving public health and environmental quality	CONAMA Resolution No. 05 of 1993	Resolution	Public Policy	Resolution	No	Not applicable	No	https://www.ibama.gov.br/sophia/cnia/legislacao/MMA/RE0005-050893.PDF
1993	Provisions on the territorial sea, the contiguous zone, the exclusive economic zone and the Brazilian continental shelf	Federal Law No. 8.617, of January 4, 1993	Law	Public Policy	Federal	No	Not applicable	No	https://www.planalto.gov.br/ccivil_03/Leis/L8617.htm
1995	Establishes the composition of the Subcommittee for the PSRM	CIRM Ordinance No. 548/MM of 1995	Ordinance	Public Policy	Federal	No	Not applicable	No	https://www.marinha.mil.br/secirm/sites/www.marinha.mil.br.secirm/files/port-548-1995.pdf
1996	Creates the GERCO Working Group (GI-GERCO)	CIRM Ordinance No. 440/MM of 1996	Ordinance	Public Policy	Federal	No	Not applicable	No	https://www.marinha.mil.br/secirm/sites/www.marinha.mil.br.secirm/files/port-440-1996.pdf
1997	Institutes the National Water Resources Policy, creates the National Water Resources Management System	Federal Law No. 9.433, of January 1997	Law	Public Policy	Law	No	Not applicable	No	https://www.planalto.gov.br/ccivil_03/leis/l9433.htm#:~:text=L9433&text=LEI%20N%C2%BA%209.433,%20DE%208%20DE%20JANEIRO%20DE%201997.&text=Institui%20a%20Pol%C3%ADtica%20Nacional%20de,Federal,%20e%20altera%20o%20art.
1997	National Coastal Management Plan II establishes GIGERCO	CIRM Resolution 05/1997	Resolution	Public Policy	Resolution	Yes	Establishes generic limits through the Waterfront Project	Yes	resolution-5-1997.pdf
1998	Creates the Port Environmental Agenda, in order to bring the port sector into line with current environmental standards and parameters.	CIRM Resolution No. 006 of 1998	Resolution	Public Policy	Federal	No	Not applicable	No	https://www.marinha.mil.br/secirm/sites/www.marinha.mil.br.secirm/files/resolucao-6-1998.pdf
1998	Provides for the creation of the Ponta Grossa Beach Environmental Protection Area and adopts other measures	Municipal Law No. 262 of April 8, 1998	Law	Municipal	Law	No	Not applicable	No	LEIS_262_1998_0000001.pdf
1998	I Federal Action Plan for the Coastal Zone	CIRM Resolution 05/1998	Resolution	Federal	Plan	No	Not applicable	No	nan
1998	Real estate owned by the Federal Government	Federal Law No. 9.636, of May 15, 1998	Law	Public Policy	Law	Yes	These are marine lands, at a depth of 33 (thirty-three) meters, measured horizontally, for the part of the land, from the position of the line of the mean high tide of 1831	No	https://www.planalto.gov.br/ccivil_03/Leis/L9636.htm
1999	Establishes the V Sectorial Plan for the Resources of the Sea (PSRM) - 1999 - 2003, and addresses coordination with GERCO	Federal Decree No. 2.956, of February 3, 1999	Decree	Federal	Policy	No	Not applicable	No	https://www.planalto.gov.br/ccivil_03/decreto/D2956.htm
2000	Creates the National System of Conservation Units (SNUC) and provides for the preparation of Management Plans (Art. 27).	Federal Law No. 9.985, of July 18, 2000	Law	Public Policy	Federal	No	Not applicable	No	https://www.planalto.gov.br/ccivil_03/leis/l9985.htm
2000	Provides for bathing conditions and their implications for human well-being. (Art. 2) Fresh, brackish and saline waters intended for and saline waters intended for bathing (primary contact recreation) will have their condition evaluated in the proper and categories.	CONAMA Resolution No. 274 of 2000	Resolution	Public Policy	Federal	No	Not applicable	No	http://pnqa.ana.gov.br/Publicacao/Resolu%C3%A7%C3%A3o_Conama_274_Balneabilidade.pdf
2000	Provides for the restructuring of waterway and land transport, and aims (Art 11, V) to make transport compatible with the preservation of the environment. preservation of the environment	Federal Law No. 10.233, June 5, 2001	Law	Public Policy	Law	No	Not applicable	No	https://www.planalto.gov.br/ccivil_03/leis/leis_2001/L10233.htmcompilado.htm
2000	Provides for the creation of the Barra Grande Mangrove Environmental Protection Area and adopts other measures	Municipal Law no. 298, of May 12, 2000	Law	Municipal	Law	No	Not applicable	No	lei_apa_manguezal_da_barra_grande.pdf
2001	Regulates Law no. 9.636/1998	Federal Decree No. 3.725, of January 10, 2001	Decree	Public Policy	Policy	Yes	These are marine lands, at a depth of 33 (thirty-three) meters, measured horizontally, for the part of the land, from the position of the line of the mean high tide of 1831	No	https://www.planalto.gov.br/ccivil_03/decreto/2001/D3725.htm
2001	Establishes the Municipal Council for Sustainable Development and makes other provisions	Municipal Decree no. 318, of June 26, 2001	Decree	Public Policy	Policy	No	Not applicable	No	LEIS_318_2001_0000001.pdf
2001	City Statute, incentives for the Master Plan	Federal Law No. 10.257, of July 10, 2001	Law	Public Policy	Law	No	Not applicable	No	https://www.planalto.gov.br/ccivil_03/Leis/LEIS_2001/L10257.htm
2001	Implementation of the Orla Project by the MMA	Not applicable	Not applicable	Project	Federal	Yes	In the marine zone: 10 m isobath In the land area: 50 m in urbanized areas 200 m in non-urbanized areas Demarcated from the Limit of the Preamar Line or the Final Limit of Ecosystems On sedimentary cliffs: 50 m from the edge of the cliffs In areas subject to erosion, a survey of past erosion events must be carried out in order to define the length of the emerged strip of coastline.	Yes	nan
2002	Provides for the parameters, definitions and limits of Permanent Preservation Areas of reservoirs and the use regime of the surroundings	CONAMA RESOLUTION no. 302, of March 20, 2002	Resolution	Public Policy	Federal	Yes	§ Paragraph 1 - The limits of the Permanent Preservation Area provided for in item I may be expanded or reduced, observing the minimum threshold of thirty meters, as established in the environmental license and in the water resources plan for the basin where the reservoir is located, if any. where the reservoir is located, if any	No	http://www.aesa.pb.gov.br/aesa-website/wp-content/uploads/2018/02/Resolu%C3%A7%C3%A3o-n%C2%BA-302-de-20-de-Mar%C3%A7o-de-2002-CONAMA.pdf#:~:text=RESOLU%C3%87%C3%83O%20CONAMA%20no.%20302%2C%20de%2020%20de%20mar%C3%A7o,artificiais%20e%20o%20regime%20de%20uso%20do%20entorno.
2002	Provides for parameters, definitions and limits for Permanent Areas	CONAMA RESOLUTION No. 303, of March 20, 2002	Resolution	Public Policy	Federal	Yes	Considers the limits for APPs	No	https://conama.mma.gov.br/?option=com_sisconama&task=arquivo.download&id=299
2002	Creates, within the municipality of Icapuí-CE, the Icapuí-CE Agenda 21 commission, with the aim of implementing the actions recommended in the local Agenda 21 in the municipality.	Municipal Law no. 352, of July 10, 2002	Law	Municipal	Law	No	Not applicable	No	LEIS_352_2003_0000001.pdf
2002	Amends Law No. 318/2001 on the Icapuí Municipal Council for Sustainable Development	Municipal Law No. 361, of December 2, 2002	Law	Public Policy	Law	No	Not applicable	No	https://www.icapui.ce.gov.br/arquivos/1238/LEIS_361_2003_0000001.pdf
2002	Regulates articles of Law No. 9.985, of July 18, 2000, which provides for the National System of Nature Conservation Units - SNUC, and makes other provisions.	Federal Decree No. 4.340, August 22, 2002	Decree	Public Policy	Decree	No	Not applicable	No	http://www.planalto.gov.br/ccivil_03/decreto/2002/d4340.htm
2002	Waterfront Project Manuals	Not applicable	Not applicable	Technical/Scientific Document	Federal	Yes	Establishes generic limits through the Orla Project	Yes	https://www.gov.br/economia/pt-br/assuntos/patrimonio-da-uniao/arquivos-anteriores-privados/projeto-orla/projeto-orla
2003	Provides for the establishment of Area Plans to combat oil pollution in waters under national jurisdiction	Federal Decree No. 4.871, of November 6, 2003	Decree	Public Policy	Decree	No	Not applicable	No	https://www.planalto.gov.br/ccivil_03/decreto/2003/d4871.htm#:~:text=DECRETO%20N%C2%BA%204.871,%20DE%206,que%20lhe%20confere%20o%20art.
2003	Provides criteria for the characterization of sustainable activities or sustainable tourism enterprises as being of social interest for the purposes of occupying dunes originally devoid of vegetation in the devoid of vegetation, in the Coastal Zone	CONAMA RESOLUTION No. 341, of September 25, 2003	Resolution	Public Policy	Federal	Yes	Considers the limits for APPs	No	https://conama.mma.gov.br/?option=com_sisconama&task=arquivo.download&id=372
2004	Implementation of the Orla Project in the municipality of Icapuí	Not applicable	Not applicable	Technical/Scientific Document	Federal	Yes	Establishes generic limits through the Orla Project	Yes	https://www.sema.ce.gov.br/wp-content/uploads/sites/36/2019/05/PGI-DE-Icapui.pdf
2004	Regulates Law No. 7.661/1988 - Regulates Law No. 7.661 of 1988 establishing the PNGC. Provides for rules on the use and occupation of the coastal zone and establishes criteria for managing the coastline. Defines the limits of the seafront and the preparation and implementation of the Plan (Projeto Orla).	Federal Decree No. 5.300, of December 7, 2004	Decree	Federal	Decree	Yes	In the marine zone: 10 m isobath In the land area: 50 m in urbanized areas 200 m in non-urbanized areas Demarcated from the Limit of the Preamar Line or the Final Limit of Ecosystems On sedimentary cliffs: 50 m from the edge of the cliffs In areas subject to erosion, a survey of past erosion events must be carried out in order to define the length of the emerged strip of coastline.	Yes	https://www.planalto.gov.br/ccivil_03/_Ato2004-2006/2004/Decreto/D5300.htm
2004	I National Seminar on the Waterfront Project and signing of agreements with municipalities	Not applicable	Not applicable	Event	Federal	Yes	Establishes generic limits through the Orla Project	Yes	nan
2004	Authorization for the use of physical space in bodies of water in the Union's domain for aquaculture purposes	SEAP/MMA/MP Interministerial Normative Instruction No. 6 of 2004	Not applicable	Federal	Policy	No	Not applicable	No	https://acervo.socioambiental.org/sites/default/files/documents/N8D00027.pdf
2004	Macro-diagnosis of the Coastal Zone	Not applicable	Not applicable	Technical/Scientific Document	Federal	No	Not applicable	No	nan
2005	Approves the National Policy for the Resources of the Sea	Federal Decree No. 5.377, of February 25, 2005	Decree	Public Policy	Policy	No	Not applicable	No	https://www.planalto.gov.br/ccivil_03/_Ato2004-2006/2005/Decreto/D5377.htm
2005	Provides for the classification of bodies of water and environmental guidelines for their classification, as well as establishing the conditions and standards for discharging effluents.	CONAMA Resolution No. 357 of 2005	Resolution	Public Policy	Resolution	No	Not applicable	No	https://www.icmbio.gov.br/cepsul/images/stories/legislacao/Resolucao/2005/res_conama_357_2005_classificacao_corpos_agua_rtfcda_altrd_res_393_2007_397_2008_410_2009_430_2011.pdf
2005	II Federal Action Plan for the Coastal Zone	CIRM Resolution 07/2005	Resolution	Federal	Plan	No	Not applicable	No	https://www.marinha.mil.br/secirm/sites/www.marinha.mil.br.secirm/files/resolucao-5-2004.pdf
2005	Approves the VI Sectorial Plan for the Resources of the Sea - VI PSRM.	Federal Decree No. 5.382, of March 3, 2005	Decree	Public Policy	Policy	No	Not applicable	No	nan
2006	Establishes the National Strategic Plan for Protected Areas - PNA, integrated with terrestrial and marine landscapes	Federal Decree No. 5.758 of 2006	Decree	Federal	Policy	No	Not applicable	No	https://www.planalto.gov.br/ccivil_03/_ato2004-2006/2006/decreto/d5758.htmhtm06/2006/decreto/d5758.htm
2006	State Coastal Management Policy and State Coastal Management Plan	State Law No. 13.796, of June 30, 2006	Law	Public Policy	Law	Yes	Establishes generic limits through the Waterfront Project	Yes	LEI-Nº-13.796_-2006_PEGC.pdf
2006	Geoenvironmental Zoning of the State of Ceará	Not applicable	Not applicable	Technical/Scientific Document	State	No	Not applicable	No	nan
2006	Atlantic Forest Law. Provides for the conservation, protection, regeneration and use of a set of ecosystems components of the Atlantic Forest biome	Federal Law No. 11.428, of December 22, 2006	Law	Public Policy	Law	No	Not applicable	No	https://www.planalto.gov.br/ccivil_03/_ato2004-2006/2006/lei/l11428.htm
2006	Provides for exceptional cases of public utility, social interest or low environmental impact, which make it possible to intervention or suppression of vegetation in Permanent Preservation Areas (PPAs), such as sandbanks and mangroves	CONAMA Resolution No. 369 of 2006	Resolution	Public Policy	Resolution	Yes	Considers the limits for APPs	No	https://www.ibama.gov.br/sophia/cnia/legislacao/MMA/RE0369-280306.PDF
2006	Launch of the book "Erosion and Degradation of the Brazilian Coast"	Not applicable	Not applicable	Technical/Scientific Document	Federal	No	Not applicable	Yes	nan
2007	Complements the Atlantic Forest Law and validates previous resolutions on the biome	CONAMA Resolution No. 388 of 2007	Resolution	Public Policy	Resolution	No	Not applicable	No	https://cetesb.sp.gov.br/licenciamento/documentos/2007_Res_CONAMA_388.pdf
2007	Establishes the operational procedures for the authorization of the use of physical spaces in bodies of water of for aquaculture purposes	Interministerial Normative Instruction No. 01 of 2007	Not applicable	Public Policy	Policy	No	Not applicable	No	https://www.gov.br/economia/pt-br/assuntos/patrimonio-da-uniao/legislacao/instrucoes-normativas/instrucoes-normativas-arquivos-pdf/in-interministerial-01-2007-aquicultura.pdf
2007	Makes the ASTUMAC Association for Tourism, Environment and Culture a public interest organization	Municipal Law no. 480, of April 26, 2007	Law	Municipal	Law	No	Not applicable	No	icapui.ce.gov.br/arquivos/1310/LEIS_480_2007_0000001.pdf
2008	II National Seminar on the Waterfront Project	Not applicable	Not applicable	Event	Federal	Yes	Establishes generic limits through the Orla Project	Yes	nan
2008	Establishes the Ceará Forum on Climate Change and Biodiversity	State Decree No. 30.066, of April 25, 2008	Decree	Public Policy	State	No	Not applicable	No	nan
2008	Municipal Environmental Quality Index - IQM	State Decree no. 29.306, of June 5, 2008	Decree	Public Policy	Decree	No	Not applicable	No	https://www.sema.ce.gov.br/wp-content/uploads/sites/36/2021/09/Decreto-Estadual-no-29.306-de-05-de-junho-de-2008-Indice-Municipal-de-Qualidade-de-Meio-Ambiente-IQM.pdf
2008	Approves the VII Sectoral Plan for Marine Resources	Federal Decree No. 6.678, of December 8, 2008	Decree	Public Policy	Policy	No	Not applicable	No	https://www.planalto.gov.br/ccivil_03/_Ato2007-2010/2008/Decreto/D6678.htm
2009	Establishes the National Policy on Climate Change - PNMC	Federal Law No. 12.187, of December 29, 2009	Law	Public Policy	Law	No	Not applicable	No	https://www.planalto.gov.br/ccivil_03/_ato2007-2010/2009/lei/l12187.htm
2009	Declares an abnormal situation, characterized as an emergency, in the municipality of Icapuí - CE, affected by marine erosion.	Municipal Decree No. 16, of May 21, 2009	Decree	Municipal	Policy	No	Not applicable	Yes	icapui.ce.gov.br/arquivos/374/DECRETOS MUNICIPAIS_001_2018_0000001.pdf
2009	Land regularization of occupations on federal land	Federal Law No. 11.925, of June 25, 2009	Law	Public Policy	Law	Yes	They are marine lands, at a depth of 33 (thirty-three) meters, measured horizontally, for the part of the land, from the position of the line of the mean high tide of 1831	No	https://www.planalto.gov.br/ccivil_03/_Ato2007-2010/2009/Lei/L11952.htm
2010	III National Seminar on the Waterfront Project	Not applicable	Not applicable	Event	Federal	Yes	Establishes generic limits through the Orla Project	Yes	nan
2010	Establishes Icapui's Municipal Environmental Policy and makes other provisions	Municipal Law No. 541, of December 29, 2010	Law	Municipal	Law	No	Not applicable	No	icapui.ce.gov.br/arquivos/188/LEIS_541_2010_0000001.pdf
2010	Provides for the creation of the Municipal Institute for Environmental Inspection and Licensing of Icapui- IMFLA - and makes other provisions	Municipal Law No. 542, of December 29, 2010	Law	Municipal	Law	No	Not applicable	No	icapui.ce.gov.br/arquivos/187/LEIS_542_2010_0000001.pdf
2010	Establishes the National Solid Waste Policy - PNRS.	Federal Law No. 12.305, of August 2, 2010	Law	Public Policy	Law	No	Not applicable	No	https://www.planalto.gov.br/ccivil_03/_ato2007-2010/2010/lei/l12305.htm
2010	Provides for the creation of the Fund for the Defense of the Environment - Fundema and makes other provisions	Municipal Law No. 543, of December 29, 2010	Law	Public Policy	Municipal	No	Not applicable	No	icapui.ce.gov.br/arquivos/186/LEIS_543_2010_0000001.pdf
2010	Creates non-buildable areas of permanent preservation, of relevant ecological, environmental and landscape interest in the municipality of Icapuí	Municipal Law No. 540, of December 29, 2010	Law	Municipal	Law	Yes	Determines non-buildable areas in APPs	No	https://cmicapui.ce.gov.br/arquivos/228/_540_2010.pdf
2011	Establishes the State System of Conservation Units of Ceará - SEUC, and makes other provisions	State Law No. 14.950, of June 27, 2011	Law	Public Policy	Law	No	Not applicable	No	https://www.sema.ce.gov.br/wp-content/uploads/sites/36/2018/10/14.950.pdf
2011	Changes the composition of GI-GERCO	Resolution No. 003 of 2011	Resolution	Public Policy	Federal	No	Not applicable	No	https://www.marinha.mil.br/secirm/sites/www.marinha.mil.br.secirm/files/resolucao-3-2011.pdf
2011	Approves the VIII Sectoral Plan for the Resources of the Sea (PSRM)	CIRM Resolution No. 006 of 2011	Resolution	Public Policy	Policy	No	Not applicable	No	https://www.marinha.mil.br/secirm/sites/www.marinha.mil.br.secirm/files/resolucao-6-2011.pdf
2012	Establishes the National Civil Protection and Defense Policy. Defines the duty of the Union, the States, the Federal District and the Municipalities to adopt the necessary measures to reduce the risks of disaster	Federal Law No. 12.608, of April 10, 2012	Law	Public Policy	Law	No	Not applicable	No	https://www.planalto.gov.br/ccivil_03/_ato2011-2014/2012/lei/l12608.htm
2012	Regulates the Environmental Public Policy Council (CONPAM)	State Decree No. 30.816, of January 25, 2012	Decree	Public Policy	Decree	No	Not applicable	No	nan
2012	Provides for the protection of native vegetation; amends Laws Nos. 6.938, of August 31, 1981, 9.393, of December 19, 1996, and 11.428, of December 22, 2006; repeals Laws Nos. 4.771, of September 15, 1965, and 7.754, of April 14, 1989, and Provisional Measure No. 2.166-67, of August 24, 2001; and makes other provisions.	Federal Law No. 12.651, of May 25, 2012	Law	Public Policy	Law	Yes	Considers the limits for APPs	No	https://www.planalto.gov.br/ccivil_03/_ato2011-2014/2012/lei/l12651.htm
2012	Regulation of the SEUC State Law	State Decree No. 30.880, of April 12, 2012	Decree	Public Policy	Policy	No	Not applicable	No	https://www.sema.ce.gov.br/wp-content/uploads/sites/36/2021/09/Decreto-Estadual-no-30.880-de-12-de-abril-de-2012-Regulamentacao-da-Lei-Estadual-do-SEUC.pdf
2013	New Ports Law. Provides for the direct and indirect exploitation by the Federal Government of ports and port facilities and the activities carried out by port operators	Federal Law No. 12.815 of 2013	Law	Public Policy	Law	No	Not applicable	No	https://www.planalto.gov.br/ccivil_03/_ato2011-2014/2013/lei/l12815.htm/
2013	Regulates Ports Law No. 12.815 of 2013	Federal Decree No. 8.033, of June 27, 2013	Decree	Public Policy	Policy	No	Not applicable	No	https://www.planalto.gov.br/ccivil_03/_ato2011-2014/2013/decreto/D8033compilado.htm
2013	Provides for the creation of RPPNs in the state of Ceará	State Decree no. 31.255, of June 26, 2013	Decree	Public Policy	Policy	No	Not applicable	No	https://www.sema.ce.gov.br/wp-content/uploads/sites/36/2021/09/Decreto-Estadual-no-31.255-de-26-de-junho-de-2013-Dispoes-sobre-a-criacao-de-RPPNs-no-Estado-do-Ceara.pdf
2015	Amends Decree-Law No. 9760 of September 5, 1946, Decree-Law No. 2398 of December 21, 1987, Law No. 9636 of May 15, 1998, and Decree-Law No. 1876 of July 15, 1981; provides for the installment payment and remission of property debts to the Federal Government; and makes other provisions.	Federal Law No. 13,139, of June 26, 2015	Law	Public Policy	Law	Yes	They are marine lands, at a depth of 33 (thirty-three) meters, measured horizontally, for the part of the land, from the position of the line of the mean high tide of 1831	No	https://www.planalto.gov.br/ccivil_03/_Ato2015-2018/2015/Lei/L13139.htm
2015	Provides for the administration, disposal, transfer of management of federal real estate and its use for the constitution of funds; amends Law No. 9.636, of May 15, 1998, and Decree-Laws Nos. 3.438, of July 17, 1941, 9.760, of September 5, 1946, 271, of February 28, 1967, and 2.398, of December 21, 1987; and repeals a provision of Law No. 13.139, of June 26, 2015.	Federal Law No. 13.240, of December 30, 2015	Law	Public Policy	Law	Yes	These are marine lands, at a depth of 33 (thirty-three) meters, measured horizontally, for the part of the land, from the position of the line of the mean high tide of 1831	No	https://www.planalto.gov.br/ccivil_03/_ato2015-2018/2015/lei/l13240.htm
2015	III Federal Action Plan for the Coastal Zone	CIRM Resolution No. 1 of 2015	Resolution	Federal	Plan	No	Not applicable	No	https://www.marinha.mil.br/secirm/secirm/sites/www.marinha.mil.br.secirm/files/resolucao1-2015-ata189.pdf
2015	Extinction of CONPAM and creation of the Secretariat for the Environment (SEMA)	State Law No. 15.773, of March 10, 2015	Law	Public Policy	Law	No	Not applicable	No	nan
2015	Creation of the MPF-GERCO project	Not applicable	Not applicable	Project	Federal	No	Not applicable	No	nan
2015	Approves the IX Sectoral Plan for the Resources of the Sea (IX PSRM) 2016-2019	CIRM Resolution No. 2 of 2015	Resolution	Public Policy	Policy	No	Not applicable	No	https://www.marinha.mil.br/secirm/secirm/sites/www.marinha.mil.br.secirm/files/resolucao2-2015-ata191.pdf
2016	Establishes the National Plan for Adaptation to Climate Change	Ministerial Ordinance No. 150 of 2016	Ordinance	Public Policy	Policy	No	Not applicable	No	https://www.in.gov.br/web/guest/materia/-/asset_publisher/Kujrw0TZC2Mb/content/id/22804297/do1-2016-05-11-portaria-n-150-de-10-de-maio-de-2016-22804223
2016	Establishes the State Policy on Climate Change (PEMC)	State Law No. 16.146, of December 14, 2016	Law	Public Policy	Law	No	Not applicable	No	nan
2016	Restructuring and updating the Ceará Ecological-Economic Zoning Project Mapping - Coastal Zone and Coastal Conservation Units	Not applicable	Not applicable	Technical/Scientific Document	State	No	Not applicable	No	nan
2016	Approves the IX Sectoral Plan for Marine Resources	Federal Decree No. 8.907, of November 2016	Decree	Public Policy	Policy	No	Not applicable	No	https://www.planalto.gov.br/ccivil_03/_ato2015-2018/2016/decreto/d8907.htm
2017	UN Voluntary Commitments - PROCOSTA	Ocean Action 19679	Commitment	International	International	No	Not applicable	No	nan
2017	UN Voluntary Commitments - Combating Litter at Sea	Ocean Action 19694	Commitment	International	International	No	Not applicable	No	nan
2017	UN Voluntary Commitments - Marine Spatial Planning	Ocean Action 19704	Commitment	International	International	No	Not applicable	No	nan
2017	Establishes the Beach Management Center - NUGEP	SPU Ordinance No. 4.192 of 2018	Ordinance	Federal	Policy	Yes	These are marine lands, at a depth of 33 (thirty-three) meters, measured horizontally, for the land part, from the position of the 1831 mean high tide line.	No	https://www.in.gov.br/materia/-/asset_publisher/Kujrw0TZC2Mb/content/id/12511900/do2-2018-05-02-portaria-n-4-192-de-27-de-abril-de-2018-12511896
2017	Transfer of Beach Management (TAGP) to Coastal Municipalities	SPU Ordinance 113/2017, which regulates art. 14 of Law 13.240 of 2015	Ordinance	Public Policy	Federal	Yes	These are marine lands, at a depth of 33 (thirty-three) meters, measured horizontally, for the land part, from the position of the 1831 mean high tide line.	No	https://colaborativo-spu.gestao.gov.br/sites/default/files/public/2024-01/PORTARIA%20N%C2%BA%20113%2C%20DE%2012%20DE%20JULHO%20DE%202017.pdf
2017	Request for the Beach Management Adhesion Term (TAGP) by Icapuí City Hall	Request made on September 14, 2017	Not applicable	Federal	Policy	Yes	These are marine lands, at a depth of 33 (thirty-three) meters, measured horizontally, for the part of the land, from the position of the line of the mean high tide of 1831	No	https://www.gov.br/economia/pt-br/assuntos/patrimonio-da-uniao/destinacao-de-imoveis/gestao-de-praias/68-planilha-municipios-tagp-24-05-2024.pdf
2017	IV Federal Action Plan for the Coastal Zone	CIRM Resolution No. 2 of 2017	Resolution	Federal	Plan	No	Not applicable	No	https://www.marinha.mil.br/secirm/secirm/sites/www.marinha.mil.br.secirm/files/documentos/atas/resolucao-2-2017.pdf
2017	Amends arts. 1, 2, 3, 6 and 7 of law 543/2010, which provides for the creation of the Environmental Defense Fund - FUNDEMA, and makes other provisions	Municipal Law No. 686 of March 24, 2017	Law	Municipal	Law	No	Not applicable	No	icapui.ce.gov.br/arquivos/206/LEIS_686_2017_0000001.pdf
2017	Amends the heading of art. 1 of law 542/2010, of December 29, 2010, which provides for the creation of the Municipal Institute for Environmental Inspection and Licensing - IMFLA, and makes other provisions	Municipal Law no. 684 of February 20, 2017	Law	Municipal	Law	No	Not applicable	No	icapui.ce.gov.br/arquivos/204/LEIS_684_2017_0000001.pdf
2018	Decrees emergency situation in coastal areas of the Municipality of Icapuí affected by marine erosion and makes other provisions	Municipal Decree No. 01 of January 11, 2018	Decree	Municipal	Policy	No	Not applicable	Yes	DECRETOS MUNICIPAIS_001_2018_0000001.pdf
2018	Extends the term of validity of Decree No. 01/2018 of January 11, 2018, which declares an emergency situation in coastal areas of the Municipality of Icapuí affected by marine erosion, and makes other provisions	Municipal Decree No. 19 of May 30, 2018	Decree	Municipal	Policy	No	Not applicable	Yes	DECRETOS MUNICIPAIS_019_2018_0000001.pdf
2018	Declares an emergency situation in coastal areas of the Municipality of Icapuí affected by marine erosion and makes other provisions	Municipal Decree No. 41, of October 11, 2018	Decree	Municipal	Policy	No	Not applicable	Yes	DECRETOS MUNICIPAIS_041_2018_0000001.pdf
2018	Institutes PROCOSTA - Institutes the National Program for the Conservation of the Coastline. Aims to promote integrated management of the coastline, its technical and scientific knowledge, its variations according to extreme events and climate change, multiple uses and protection of marine and coastal ecosystems.	MMA Ordinance 76/18	nan	Federal	Federal	No	Not applicable	Yes	nan
2018	Launch of the book "Panorama of Coastal Erosion"	Not applicable	Not applicable	Technical/Scientific Document	Federal	No	Not applicable	Yes	nan
2018	Establishes the first organizing committee to draw up the 1st National Plan to Combat Litter at Sea	Not applicable	Not applicable	Event	Federal	No	Not applicable	No	nan
2018	Establishes the general rules and procedures applicable to Urban Land Regularization and establishes the procedures for evaluation and disposal of federal properties. Stresses the need to maintain free and open access to beaches	Federal Decree No. 9.310 of 2018	Decree	Federal	Decree	Yes	They are marine lands, at a depth of 33 (thirty-three) meters, measured horizontally, for the part of the land, from the position of the preamar-medium line of 1831	No	https://www.planalto.gov.br/ccivil_03/_ato2015-2018/2018/decreto/d9310.htm
2018	Provides for the concepts and criteria for identifying areas of Union domain, managed by the SPU. Defines Union property that does not require a demarcation process for its identification, such as beaches. The the basic methodological procedures and definitions for identifying federal areas. It also addresses conceptual conceptual aspects and the 30m safety strip is reiterated.	Normative Instruction No. 2 of 2018	Not applicable	Federal	Federal	Yes	delimitation of the 30-meter safety strip from the line at the end of the beach	No	https://www.in.gov.br/web/guest/materia/-/asset_publisher/Kujrw0TZC2Mb/content/id/34554817/do1-2018-07-30-instrucao-normativa-n-2-de-27-de-julho-de-2018-34554799#:~:text=%C2%A71%C2%BA%20A%20identifica%C3%A7%C3%A3o%20das,%22Identifica%C3%A7%C3%A3o%20Simplificada%20-%20IS%22.
2018	Amends Ordinance 4.192 of 2018 on the creation of the NUGEP	MP/SPU Ordinance No. 6.446 of 2018	Not applicable	Public Policy	Federal	Yes	These are marine lands, at a depth of 33 (thirty-three) meters, measured horizontally, for the land part, from the position of the 1831 mean high tide line.	No	https://memoria-spu.gestao.gov.br/normas-e-documentos/132157-2/
2018	Resolution No. 1 - Guidelines for Coastal Prevention and Protection	CIRM Resolution No. 1 of 2018	Resolution	Technical/Scientific Document	Federal	No	Not applicable	Yes	https://www.marinha.mil.br/secirm/sites/www.marinha.mil.br.secirm/files/documentos/atas/resolucao-1-2018.pdf
2018	GUIDELINES FOR THE PREVENTION AND PROTECTION OF COASTAL EROSION	Not applicable	Not applicable	Technical/Scientific Document	Federal	No	Not applicable	Yes	https://www.marinha.mil.br/secirm/sites/www.marinha.mil.br.secirm/files/pngc/documentos/Guia-de-diretrizes-de-preven%C3%A7%C3%A3o-e-prote%C3%A7%C3%A3o-%C3%A0-eros%C3%A3o-costeira.pdf
2018	SDG 14 Working Group	CIRM Resolution No. 2 of 2018	Resolution	Public Policy	Resolution	No	Not applicable	No	https://www.marinha.mil.br/secirm/sites/www.marinha.mil.br.secirm/files/documentos/atas/resolucao-2-2018.pdf
2019	Extends the Transfer of Beach Management	SPU Ordinance 44/2019	Ordinance	Public Policy	Policy	Yes	They are marine lands, at a depth of 33 (thirty-three) meters, measured horizontally, for the part of the land, from the position of the preamar-medium line of 1831	No	https://memoria-spu.gestao.gov.br/normas-e-documentos/132135-2/
2019	Defines the competencies of GI-GERCO in the context of the Federal Action Plan for the Coastal Zone (PAF-ZC) that can contribute to to improving beach management	SE-CIRM Ordinance No. 144 of 2019	Ordinance	Federal	Policy	No	Not applicable	No	https://www.gov.br/economia/acl_users/credentials_cookie_auth/require_login?came_from=https%3A//www.gov.br/economia/pt-br/assuntos/patrimonio-da-uniao/destinacao-de-imoveis/arquivos/2019/portaria-144-secirm-criacao-gigerco.pdf
2019	Extinguishes and establishes guidelines, rules and limitations for collegiate bodies in the federal public administration	Federal Decree No. 9.759, of April 11, 2019	Decree	Public Policy	Policy	No	Not applicable	No	https://www.planalto.gov.br/ccivil_03/_ato2019-2022/2019/decreto/d9759.htm
2019	Provides for the transfer of properties from the General Social Security System Fund to the Federal Government. (Art. 14.) The Federal Government is authorized to transfer the management of federal maritime, estuarine, lake and river shores and beaches to municipalities, including areas of common use with economic exploitation, such as promenades, squares and public parks.	Federal Law No. 13.813, of April 9, 2019	Law	Public Policy	Law	Yes	They are marine lands, at a depth of 33 (thirty-three) meters, measured horizontally, for the part of the land, from the position of the line of the mean high tide of 1831	No	https://www.planalto.gov.br/ccivil_03/_ato2019-2022/2019/lei/l13813.htm
2019	It establishes the shared management of tourist areas, under the domain of the Union, with a view to developing joint actions for the regularization and use of areas with tourist potential, as well as developing them to attract investment and increase the flow of international and national tourists to Brazil. Indicates the specific condition of the destination of Union property for the coastal st…	Interministerial Ordinance No. 151 of 2019 (Ministry of Economy and Ministry of Tourism)	Law	Public Policy	Law	Yes	They are marine lands, at a depth of 33 (thirty-three) meters, measured horizontally, for the part of the land, from the position of the line of the mean high tide of 1831	No	https://www.in.gov.br/materia/-/asset_publisher/Kujrw0TZC2Mb/content/id/70929361/do1e-2019-04-10-portaria-interministerial-n-151-de-10-de-abril-de-2019-70929357
2019	Provides for the National Policy for the Sustainable Development of Aquaculture and Fishing	Federal Law No. 11.959, of June 29, 2019	Law	Public Policy	Law	No	Not applicable	No	https://www.planalto.gov.br/ccivil_03/_ato2007-2010/2009/lei/l11959.htm#:~:text=Disp%C3%B5e%20sobre%20a%20Pol%C3%ADtica%20Nacional,1967,%20e%20d%C3%A1%20outras%20provid%C3%AAncias.
2019	Regulates the transfer of management of non-urban beaches provided for in art. 14 of Law 13.240 of 2015	Federal Ordinance ME/SPU No. 44 of 2019	Ordinance	Public Policy	Policy	Yes	They are marine lands, at a depth of 33 (thirty-three) meters, measured horizontally, for the part of the land, from the position of the preamar-medium line of 1831	No	https://www.in.gov.br/web/dou/-/portaria-n-44-de-31-de-maio-de-2019-161204673
2020	Establishes the national guidelines for basic sanitation and the federal basic sanitation policy	Federal Law No. 14.026, July 16, 2020	Law	Public Policy	Law	No	Not applicable	No	https://www.planalto.gov.br/ccivil_03/_ato2019-2022/2020/lei/l14026.htm#
2020	Provides for the authorization of the use of physical spaces of bodies of water in the Union's domain for aquaculture purposes.	Federal Decree No. 10.576 of 2020	Decree	Public Policy	Decree	No	Not applicable	No	https://www.planalto.gov.br/ccivil_03/_ato2019-2022/2020/decreto/D10576.htm
2020	Creation of the Chief Environmental Scientist Program of the Secretariat for the Environment (SEMA)	Not applicable	Not applicable	Action Plan	Plan	No	Not applicable	No	LEI-ESTADUAL-17378-2020-PROGRAMA-CIENTISTA-CHEFE.pdf
2020	Establishes the guidelines and procedures for inspection activities of federal properties. Contributes to detailing procedures for inspecting the use of beaches and waterfronts, as well as emphasizing the importance of sharing responsibilities in the responsibilities in management	Normative Instruction No. 23 of 2020	Not applicable	Public Policy	Policy	No	Not applicable	No	https://www.in.gov.br/en/web/dou/-/instrucao-normativa-n-23-de-18-de-marco-de-2020-249245516
2020	Establishes the Federal Development Strategy for Brazil for the period 2020 to 2031. It provides guidelines and guidelines and strategic orientations aimed at economic development with the sustainable use of ecosystem services, the exploiting potential, strengthening governance and nature conservation in marine environments	Federal Decree No. 10.531 of 2020	Decree	Public Policy	Policy	No	Not applicable	No	https://www.in.gov.br/en/web/dou/-/decreto-n-10.531-de-26-de-outubro-de-2020-285019495
2020	Approves the creation of the "Sustainable Development Goal 14 - SDG 14" Technical Group	CIRM Resolution No. 13 of 2020	Resolution	Public Policy	Federal	No	Not applicable	No	https://www.marinha.mil.br/secirm/sites/www.marinha.mil.br.secirm/files/documentos/atas/resolucao-13-2020.pdf
2020	Approves the creation of the "PEM" Executive Committee	Resolution No. 10 of 2020	Resolution	Public Policy	Federal	No	Not applicable	No	https://www.marinha.mil.br/secirm/sites/www.marinha.mil.br.secirm/files/documentos/atas/resolucao-10-2020.pdf
2020	Approves the 10th Sectoral Plan for Marine Resources.	Federal Decree No. 10.544 of November 16, 2020	Decree	Public Policy	Policy	No	Not applicable	No	https://www.in.gov.br/en/web/dou/-/decreto-n-10.544-de-16-de-novembro-de-2020-288552390
2021	Regulates the Chief Scientist Program in the State of Ceará	State Law no. 17.378, of January 4, 2021	Law	Public Policy	Law	No	Not applicable	No	nan
2021	List of municipalities that make up Brazil's coastal zone	MMA Ordinance No. 34, of February 2, 2021	Ordinance	Federal	Federal	No	Not applicable	No	https://www.in.gov.br/en/web/dou/-/portaria-mma-n-34-de-2-de-fevereiro-de-2021-302053267
2021	Provides for environmental education, establishes the municipal environmental education policy in the Municipality of Icapuí and makes other provisions	Municipal Law No. 867, of June 10, 2021	Law	Municipal	Law	No	Not applicable	No	LEIS_867_2021_0000001.pdf
2021	Establishes the Strategic Committee for Marine Spatial Planning (PEM) in Ceará	State Decree Nº34.457, of December 10, 2021	Decree	State	Policy	No	Not applicable	No	Decree no-34.457-10-of-December-of-Institution-of-Strategic-Committee-for-the-Development-and-Elaboration-of-Marine-Spatial-Planning-PEM-of-Ceara..pdf
2021	Contingency actions for incidents and/or risk situations involving environmental impacts in Ceará's Coastal and/or Marine Zone	State Decree No. 35.071, of December 21, 2022	Decree	State	Policy	No	Not applicable	No	nan
2021	Digital Coastal and Marine Atlas of Ceará on the State Environmental Spatial Data Platform (PEDEA)	Not applicable	Not applicable	Technical/Scientific Document	State	No	Not applicable	No	nan
2021	Ecological-Economic Zoning of the Coastal Zone of the State of Ceará (ZEEC)	Not applicable	Not applicable	Technical/Scientific Document	State	Yes	Determines no-take areas	No	nan
2021	Race to Zero and Under2 Coalition campaigns	Decree No. 34.283 of October 7, 2021	Not applicable	Public Policy	State	No	Not applicable	No	https://www.sema.ce.gov.br/wp-content/uploads/sites/36/2021/10/DECRETO-No-34.283-CAMPANHAS-RACE-TO-ZERO-E-UNDER2-COALITION.pdf
2021	Approves the creation of the Executive Committee on Sustainable Development - SDG 14 and the Decade of the Ocean	Resolution No. 7 of 2021	Resolution	Public Policy	Federal	No	Not applicable	No	https://www.marinha.mil.br/secirm/sites/www.marinha.mil.br.secirm/files/documentos/atas/Resolucao-7-2021alt.pdf
2022	Orla Project: manual for preparing the Orla Project Integrated Management Plan	Not applicable	Not applicable	Technical/Scientific Document	Federal	Yes	In the marine zone: 10 m isobath In the terrestrial area: 50 m in urbanized areas 200 m in non-urbanized areas Demarcated from the Limit of the Preamar Line or the Final Limit of Ecosystems On sedimentary cliffs: 50 m from the edge of the cliffs In areas subject to erosion, a survey of past erosion events must be carried out in order to define the length of the emerged strip of coastline.	Yes	https://www.gov.br/economia/pt-br/assuntos/patrimonio-da-uniao/destinacao-de-imoveis/gestao-de-praias/manual-do-projeto-orla_abril-de-2022.pdf
2022	Provides for the creation of the State Conservation Unit of the Sustainable Use Group called the Berçários da Vida Marinha Environmental Protection Area, in the Municipality of Icapuí and makes other provisions	State Decree No. 34.565, of March 1, 2022	Decree	Public Policy	State	No	Not applicable	No	DOE_APA_Marine_Life_Markets.pdf
2022	Declares an emergency situation in coastal areas of the municipality of Icapuí affected by marine erosion and takes other measures	Municipal Decree No. 14, of March 7, 2022	Decree	Municipal	Policy	No	Not applicable	Yes	DECRETOS MUNICIPAIS_014_2022_0000001.pdf
2022	Declares an emergency situation in coastal areas of the municipality of Icapuí affected by marine erosion and makes other provisions	Municipal Decree No. 24, of July 18, 2022	Decree	Municipal	Policy	No	Not applicable	Yes	DECRETOS MUNICIPAIS_024_2022_0000001.pdf
2022	The promotion of ocean culture and the preservation of mangroves in the education network of the Municipality of Icapuí are hereby instituted as municipal public policies, and other measures are taken.	Municipal Law no. 930, of November 11, 2022	Law	Municipal	Law	No	Not applicable	Yes	icapui.ce.gov.br/arquivos/1301/LEIS_930_2022_0000001.pdf
2022	State Policy for the Conservation and Sustainable Use of Marine Resources (PERM) as an Instrument for the Protection of Marine Ecosystems and Sustainable Development in the State of Ceará	State Law No. 18.298, of December 25, 2022	Law	Public Policy	Law	No	Not applicable	No	https://www.sema.ce.gov.br/wp-content/uploads/sites/36/2023/01/Lei-Estadual-no-18.298-27-de-dezembro-de-2022-Politica-Estadual-dos-Recursos-do-Mar-PERM.pdf
2022	Ceará without Garbage at Sea" Pact	Not applicable	Not applicable	State	Commitment	No	Not applicable	No	nan
2022	Implementation of the ABC+CE Plan	Decree No. 35.070, of December 21, 2022	Decree	Public Policy	State	No	Not applicable	No	https://www.sema.ce.gov.br/wp-content/uploads/sites/36/2023/01/Decreto-Estadual-no-35.070-21-de-dezembro-de-2022-Implementacao-do-Plano-ABCCE.pdf
2023	Approves the Regimental Structure and the Table of Commissioned Positions and Functions of Trust of the Ministry of the Environment and Climate Change and reassigns commissioned positions and functions of trust - National Secretariat for Climate Change - Department of Ocean and Coastal Management	Federal Decree No. 11.349, of January 2023	Decree	Public Policy	State	No	Not applicable	No	https://www.planalto.gov.br/ccivil_03/_Ato2023-2026/2023/Decreto/D11349.htm#:~:text=Aprova%20a%20Estrutura%20Regimental%20e%20o%20Quadro%20Demonstrativo,remaneja%20cargos%20em%20comiss%C3%A3o%20e%20fun%C3%A7%C3%B5es%20de%20confian%C3%A7a.
2023	Methodological Guide for the Survey of the Current Maximum High Water Mark of the State of Ceará (LPMA) - Coastline	Not applicable	Not applicable	Technical/Scientific Document	State	Yes	Guarantees a free strip with a minimum width of 33 m between the Local Maximum High Water Mark and the first public or private street	Yes	nan
2023	Coastal and Marine Atlas of Ceará 2023 (printed version)	Not applicable	Not applicable	Technical/Scientific Document	State	No	Not applicable	Yes	nan
2023	Adds paragraph to art. 1 of municipal law no. 540/2010, of December 29, 2010, which creates non-buildable areas of permanent preservation, of relevant ecological, environmental and landscape interest in the Municipality of Icapuí and makes other provisions	Municipal Law No. 962, of May 11, 2023	Law	Municipal	Law	Yes	Determines non-buildable areas in APPs	No	LEIS_962_2023_0000001.pdf
2023	Launch event for the start of work on the Participatory Master Plan for the Municipality of Icapuí	July 25, 2023	Commitment	Public Policy	Municipal	No	Not applicable	No	https://drive.google.com/drive/folders/1rRPBx5hpI4bvPebOTdhcKVbl-4F2UWlP
2023	Establishes an ad hoc Working Group to prepare a proposal for the creation of the Coastal Management Integration Group (GI-GERCO)	CIRM Resolution No. 2 of 2023	Resolution	Public Policy	Federal	No	Not applicable	No	https://www.marinha.mil.br/secirm/sites/www.marinha.mil.br.secirm/files/documentos/cirm/cirm211/resolucao-n2.pdf
2023	Approves the XI Sectoral Plan for the Resources of the Sea (XI PSRM)	CIRM Resolution No. 6 of 2023	Resolution	Federal	Resolution	No	Not applicable	No	https://www.marinha.mil.br/secirm/sites/www.marinha.mil.br.secirm/files/documentos/cirm/cirm211/resolucao-n6.pdf
2023	Approves the Vision and Principles of Marine Spatial Planning in Brazil	CIRM Resolution No. 7 of 2023	Resolution	Public Policy	Resolution	No	Not applicable	No	https://www.marinha.mil.br/secirm/sites/www.marinha.mil.br.secirm/files/documentos/cirm/cirm211/resolucao-n7.pdf
2024	Declares an emergency situation in the areas of the municipality of Icapuí affected by the intense and uncontrolled advance of the tides - coastal/marine erosion	Municipal Decree No. 11, of March 4, 2024	Decree	Public Policy	Policy	No	Not applicable	Yes	icapui.ce.gov.br/arquivos/1733/DECRETOS MUNICIPAIS_011_2024_0000001.pdf
2024	Coastal and Marine Atlas of Ceará 2023 (expanded digital version)	Not applicable	Not applicable	Technical/Scientific Document	State	No	Not applicable	Yes	nan
